# Supplementary material for: A comparative study of five physiological key parameters between four different human trophoblast-derived cell lines
Source: PubMed Central journal article supplement (PMC5517571; doi:10.1038/s41598-017-06364-z), 2017-07-19
Supplement: 41598_2017_6364_MOESM1_ESM.pdf [file 41598_2017_6364_MOESM1_ESM.pdf]

# **Supporting information - A comparative study of five physiological key parameters between four different human trophoblast-derived cell lines**

**Mario Rothbauer <sup>1,\*</sup>, Nilaypatel Kumar <sup>3</sup>, Hajnalka Gondola<sup>1</sup>, Monika Siwetz<sup>2</sup>, Berthold Huppertz <sup>2</sup> and Peter Ertl <sup>1</sup>**

<sup>1</sup> Vienna University of Technology, Faculty of Technical Chemistry, Institute of Applied Synthetic Chemistry & Institute of Chemical Technologies and Analytics, Getreidemarkt 9, 1060 Vienna, Austria

<sup>2</sup> Medical University of Graz, Institute of Cell Biology, Histology and Embryology, Harrachgasse 21/VII, 8010 Graz, Austria

<sup>3</sup> University of Vienna, Department of Pharmacognosy, Althanstrasse 14, 1090 Vienna, Austria

\* [mario.rothbauer@tuwien.ac.at](mailto:mario.rothbauer@tuwien.ac.at)

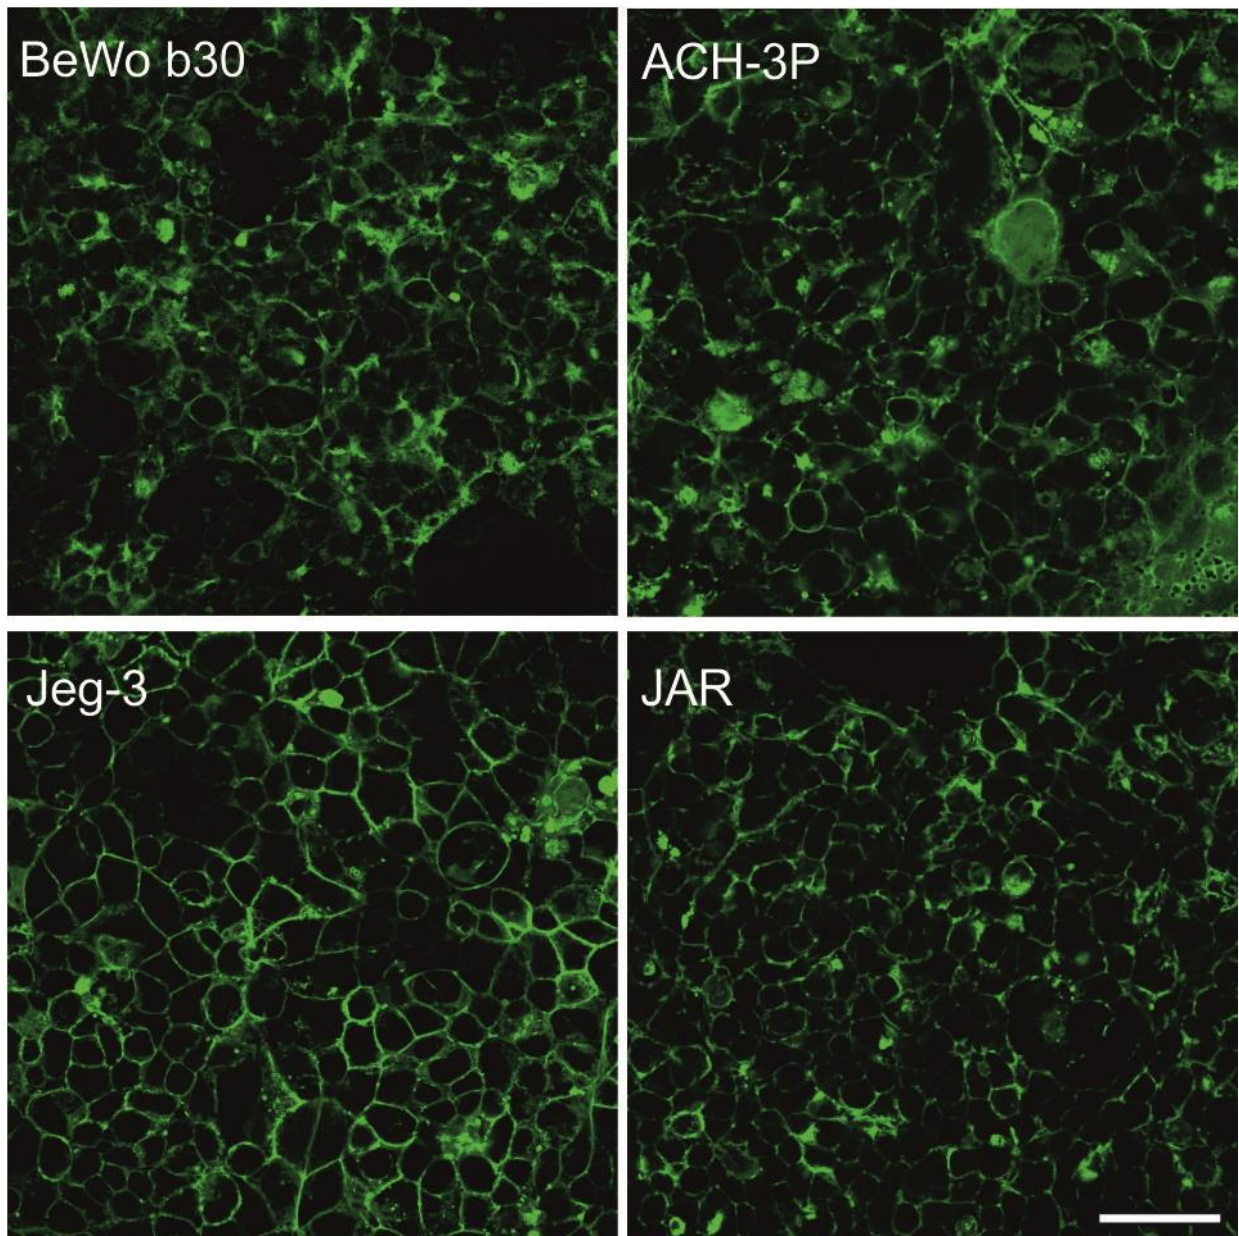

SI Fig. 1 Immunofluorescence stain for ZO-1 of placental cell models grown on 3 μm transwell 3 inserts at day 7 post-seeding.

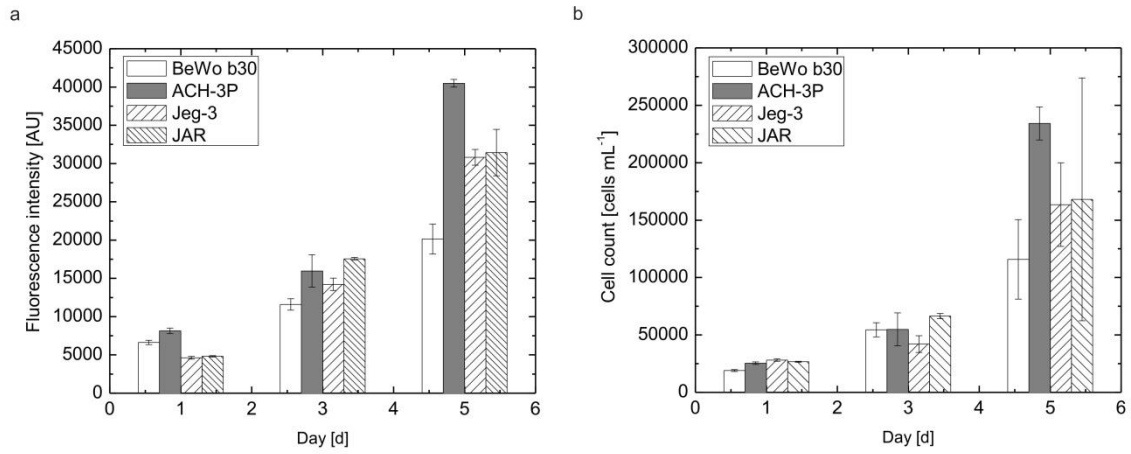

SI Fig. 2 (a) Metabolic activity and (b) proliferation of placental cell models at day 1, 3 and 5 post seeding. Data points are presented as mean values  $\pm$  SD for  $n = 3$
